# Supplementary material for: Lower Nerve Growth Factor Levels in Major Depression and Suicidal Behaviors: Effects of Adverse Childhood Experiences and Recurrence of Illness
Source: MDPI journal article supplement (doi:10.3390/brainsci13071090), 2023-07-18
Supplement: s1 [file s1]

# **ELECTRONIC SUPPLEMENTARY FILE**

Lowered nerve growth factor in major depression and suicidal behaviors: effects of adverse childhood experiences and recurrence of illness

(1,2,3,4) Michael Maes, (1) Muanpetch Rachayon<sup>1</sup>; (1,5) Ketsupar Jirakran; (6,7) Pimpayao Sodsai; (1) Atapol Sughondhabirorn

**ESF, Table S1.** Overview of the cytokines, chemokines, and growth factors measured in the current study

| <b>Protein abbreviations</b> | <b>Gene Symbol</b> | <b>Protein name</b>                                                                                        | <b>Number of samples with concentrations lower than the sensitivity (%)</b> |
|------------------------------|--------------------|------------------------------------------------------------------------------------------------------------|-----------------------------------------------------------------------------|
| IL-1 $\beta$                 | IL1B               | Interleukin-1 $\beta$                                                                                      | 0                                                                           |
| IL-2                         | IL2                | Interleukin-2                                                                                              | 0                                                                           |
| IL-6                         | IL6                | Interleukin-6                                                                                              | 0                                                                           |
| CXCL8 / IL-8                 | CXCL8              | C-X-C motif chemokine ligand 8 (IL-8)                                                                      | 0                                                                           |
| IL-12                        | IL12               | Interleukin-12                                                                                             | 0.5                                                                         |
| IL-17                        | IL17               | Interleukin-17                                                                                             | 0                                                                           |
| CCL11                        | CCL11              | Eotaxin                                                                                                    | 0                                                                           |
| G-CSF                        | CSF3               | Granulocyte Colony Stimulating Factor, Colony Stimulating Factor 3 (Granulocyte)                           | 0                                                                           |
| GM-CSF                       | CSF2               | Granulocyte-macrophage colony-stimulating factor, Colony-stimulating factor 2                              | 0                                                                           |
| IFN- $\gamma$                | IFNG               | Interferon- $\gamma$                                                                                       | 0                                                                           |
| CXCL10 / IL-10               | CXCL10             | C-X-C motif chemokine ligand 8, Interferon gamma-induced protein 10 (IP10)                                 | 0                                                                           |
| CCL2 / MCP1                  | CCL2               | C-C Motif Chemokine Ligand 2 (MCP1)                                                                        | 0                                                                           |
| CCL3 / MIP-1 $\alpha$        | CCL3               | Macrophage inflammatory protein-1 alpha, C-C Motif Chemokine Ligand 3                                      | 0                                                                           |
| CCL4 / MIP-1 $\beta$         | CCL4               | C-C Motif Chemokine Ligand 4, Macrophage Inflammatory Protein 1-Beta, Lymphocyte Activation Gene 1 Protein | 0                                                                           |
| CCL5 / RANTES                | CCL5               | C-C Motif Chemokine Ligand 5, Regulated Upon Activation, Normally T-Expressed, And Presumably Secreted     | 0                                                                           |
| TNF- $\alpha$                | TNF                | Tumor Necrosis Factor-Alpha                                                                                | 0                                                                           |
| Basic FGF                    | FGF2               | Fibroblast growth factor 2, Basic fibroblast growth factor                                                 | 0                                                                           |

|           |         |                                                                                     |   |
|-----------|---------|-------------------------------------------------------------------------------------|---|
| PDGF      | PDGFA   | Platelet Derived Growth Factor Subunit A                                            | 0 |
| VEGF      | VEGFA   | Vascular Endothelial Growth Factor                                                  | 0 |
| BNGF      | NGF     | $\beta$ -nerve growth factor (NGF)                                                  | 0 |
| SCF       | KITLG   | Stem cell factor (SCF) or Kit ligand (KITLG)                                        | 0 |
| SCGF      | CLEC11A | Stem cell growth factor (SCGF) or C-type lectin domain family 11 member A (CLEC11A) | 0 |
| M-CSF     | CSF1    | Macrophage colony-stimulating factor (M-CSF) or colony stimulating factor 1 (CSF1)  | 0 |
| HFG or SF | HGF     | Hepatocyte growth factor (HGF) or scatter factor (SF)                               | 0 |

Adapted from:

Maes M, Rachayon M, Jirakran K, Sodsai P, Klinchanhom S, Galecki P, Sughondhabirrom A, Basta-Kaim A. The Immune Profile of Major Dismood Disorder: Proof of Concept and Mechanism Using the Precision Nomothetic Psychiatry Approach. *Cells*. 2022 Mar 31;11(7):1183. doi: 10.3390/cells11071183. PMID: 35406747; PMCID: PMC8997660.

Kalayasiri R, Dadwat K, Supaksorn T, Sirivichayakul S, Maes M. Methamphetamine (MA) use, MA dependence, and MA-induced psychosis are associated with increasing aberrations in the compensatory immunoregulatory system and interleukin-1 $\alpha$  and CCL5 levels. *medRxiv* 2023.03.26.23287766; doi: <https://doi.org/10.1101/2023.03.26.23287766>

**ESF Table S2.** Description of the immune and growth factor profiles used in this study

| Immune Profile      | Members                                                                                                         |
|---------------------|-----------------------------------------------------------------------------------------------------------------|
| Neurotoxicity (NT)  | IL-1 $\beta$ , IL-6, TNF- $\alpha$ , CXCL8, CCL3, IL-2, IFN- $\gamma$ , IL-12, IL-17, CXCL10, CCL11, CCL5, CCL2 |
| Growth factors (GF) | FGF, PDGF, VEGF                                                                                                 |
| zNGF-zNT            | z NGF – z Neurotoxicity                                                                                         |
| zNGF-zGF            | z NGF – z growth factors                                                                                        |
| zNGF–z(NT+GF)       | z NGF – z (NT+GF)                                                                                               |

NGF: nerve growth factor

Maes M, Rachayon M, Jirakran K, Sodsai P, Klinchanhom S, Galecki P, Sughondhabirrom A, Basta-Kaim A. The Immune Profile of Major Dysmood Disorder: Proof of Concept and Mechanism Using the Precision Nomothetic Psychiatry Approach. *Cells*. 2022 Mar 31;11(7):1183. doi: 10.3390/cells11071183. PMID: 35406747; PMCID: PMC8997660.

Kalayasiri R, Dadwat K, Supaksorn T, Sirivichayakul S, Maes M. Methamphetamine (MA) use, MA dependence, and MA-induced psychosis are associated with increasing aberrations in the compensatory immunoregulatory system and interleukin-1 $\alpha$  and CCL5 levels. *medRxiv* 2023.03.26.23287766; doi: <https://doi.org/10.1101/2023.03.26.23287766>

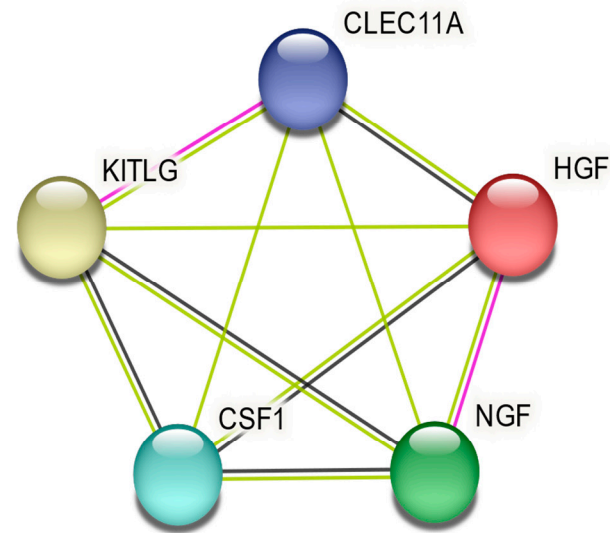

**ESF Figure S1.** Network of 5 selected growth factors. The PPI network of the 5 growth factors consists of 5 nodes and 10 edges, which is greater than the expected number of edges ( $n = 0$ ) with a p-enrichment value of  $4.19 \times 10^{-11}$ . The growth factor network has an average node degree of 4 and an average local clustering coefficient of 1. See ESF Table S1 for explanation of the gene IDs. See ESF Table S1 for gene IDs.

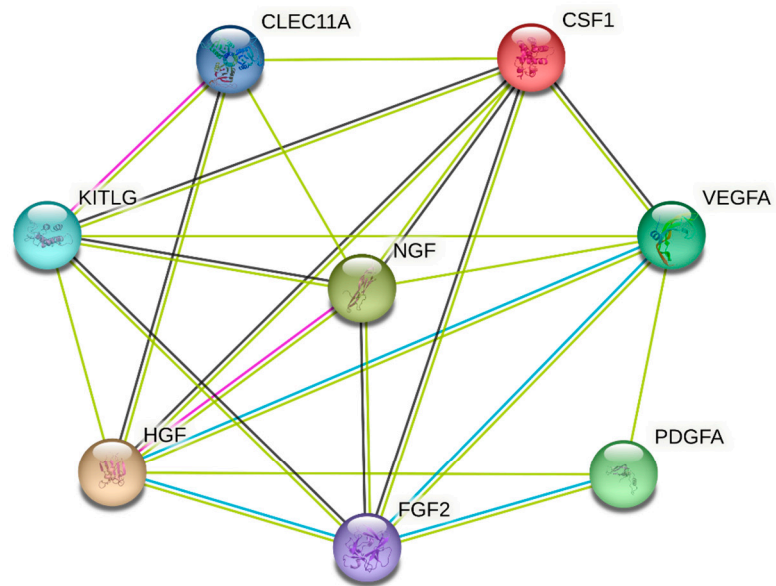

**ESF Figure S2.** Network of 8 selected growth factors. The PPI network of the 8 growth factors consists of 8 nodes and 22 edges, which is greater than the expected number of edges ( $n = 2$ ) with a p-enrichment value of  $3.22 \times 10^{-15}$ . The growth factor network has an average node degree of 5.5 and an average local clustering coefficient of 0.864. See ESF Table S1 for explanation of the gene IDs.

**ESF Table S3.** Measurements of the growth factors in healthy controls (HC), simple depression (SDMD) and major dysmood disorder (MDMD)

| Dependent Variable | MajorDysmoodDisorder | Estimates          |            |                         |             |
|--------------------|----------------------|--------------------|------------|-------------------------|-------------|
|                    |                      | Mean               | Std. Error | 95% Confidence Interval |             |
|                    |                      |                    |            | Lower Bound             | Upper Bound |
| NGF                | HC=1                 | .083 <sup>a</sup>  | .212       | -.344                   | .509        |
|                    | SDMD=2               | -.613 <sup>a</sup> | .283       | -1.184                  | -.043       |
|                    | MDMD=33              | -.900 <sup>a</sup> | .211       | -1.325                  | -.475       |
| SCF                | 1                    | .008 <sup>a</sup>  | .237       | -.469                   | .484        |
|                    | 2                    | -.043 <sup>a</sup> | .317       | -.681                   | .594        |
|                    | 3                    | -.392 <sup>a</sup> | .236       | -.867                   | .084        |
| SCGF               | 1                    | .032 <sup>a</sup>  | .231       | -.434                   | .497        |
|                    | 2                    | -.071 <sup>a</sup> | .309       | -.693                   | .552        |
|                    | 3                    | -.294 <sup>a</sup> | .230       | -.757                   | .170        |
| HGF                | 1                    | -.011 <sup>a</sup> | .236       | -.486                   | .464        |
|                    | 2                    | -.214 <sup>a</sup> | .316       | -.850                   | .422        |
|                    | 3                    | -.212 <sup>a</sup> | .235       | -.686                   | .262        |
| MCSF               | 1                    | .104 <sup>a</sup>  | .228       | -.354                   | .563        |
|                    | 2                    | .357 <sup>a</sup>  | .305       | -.256                   | .971        |
|                    | 3                    | -.077 <sup>a</sup> | .227       | -.534                   | .381        |
| NT                 | 1                    | .014 <sup>a</sup>  | .216       | -.421                   | .448        |
|                    | 2                    | .152 <sup>a</sup>  | .288       | -.429                   | .733        |
|                    | 3                    | .941 <sup>a</sup>  | .215       | .508                    | 1.374       |

|           |   |                     |      |        |       |
|-----------|---|---------------------|------|--------|-------|
| NGF/NT    | 1 | .049 <sup>a</sup>   | .193 | -.340  | .438  |
|           | 2 | -.549 <sup>a</sup>  | .258 | -1.069 | -.029 |
|           | 3 | -1.320 <sup>a</sup> | .192 | -1.707 | -.932 |
| GF        | 1 | -.025 <sup>a</sup>  | .216 | -.460  | .410  |
|           | 2 | .388 <sup>a</sup>   | .289 | -.194  | .969  |
|           | 3 | .987 <sup>a</sup>   | .215 | .554   | 1.421 |
| NGF/GF    | 1 | .069 <sup>a</sup>   | .197 | -.329  | .466  |
|           | 2 | -.639 <sup>a</sup>  | .264 | -1.171 | -.108 |
|           | 3 | -1.205 <sup>a</sup> | .197 | -1.602 | -.809 |
| NGF/NT+GF | 1 | .060 <sup>a</sup>   | .194 | -.330  | .449  |
|           | 2 | -.605 <sup>a</sup>  | .259 | -1.126 | -.083 |
|           | 3 | -1.291 <sup>a</sup> | .193 | -1.680 | -.902 |

a. Covariates appearing in the model are evaluated at the following values: Gender = 1.66, Age = 30.66.

### Pairwise Comparisons

| Dependent Variable | (I) MajorDysmoodDisorder | (J) MajorDysmoodDisorder | Mean Difference<br>(I-J) | Std. Error | Sig. <sup>b</sup> | 95% Confidence Interval for<br>Difference <sup>b</sup> |             |
|--------------------|--------------------------|--------------------------|--------------------------|------------|-------------------|--------------------------------------------------------|-------------|
|                    |                          |                          |                          |            |                   | Lower Bound                                            | Upper Bound |
| NGF                | 1                        | 2                        | .696                     | .363       | .062              | -.036                                                  | 1.428       |
|                    |                          | 3                        | .982 <sup>*</sup>        | .303       | .002              | .372                                                   | 1.592       |
|                    | 2                        | 1                        | -.696                    | .363       | .062              | -1.428                                                 | .036        |
|                    |                          | 3                        | .287                     | .350       | .417              | -.418                                                  | .991        |
|                    | 3                        | 1                        | -.982 <sup>*</sup>       | .303       | .002              | -1.592                                                 | -.372       |
|                    |                          | 2                        | -.287                    | .350       | .417              | -.991                                                  | .418        |
| SCF                | 1                        | 2                        | .051                     | .406       | .901              | -.766                                                  | .868        |



|      |   |   |        |      |      |        |       |
|------|---|---|--------|------|------|--------|-------|
|      | 2 | 3 | .399   | .338 | .244 | -.282  | 1.081 |
|      |   | 1 | -.051  | .406 | .901 | -.868  | .766  |
|      |   | 3 | .348   | .391 | .378 | -.439  | 1.135 |
|      | 3 | 1 | -.399  | .338 | .244 | -1.081 | .282  |
|      |   | 2 | -.348  | .391 | .378 | -1.135 | .439  |
| SCGF | 1 | 2 | .102   | .396 | .798 | -.696  | .900  |
|      |   | 3 | .325   | .330 | .330 | -.340  | .990  |
|      |   | 1 | -.102  | .396 | .798 | -.900  | .696  |
|      | 2 | 3 | .223   | .381 | .562 | -.545  | .991  |
|      |   | 1 | -.325  | .330 | .330 | -.990  | .340  |
|      | 3 | 2 | -.223  | .381 | .562 | -.991  | .545  |
| HGF  | 1 | 2 | .203   | .405 | .618 | -.612  | 1.018 |
|      |   | 3 | .201   | .337 | .554 | -.478  | .881  |
|      |   | 1 | -.203  | .405 | .618 | -1.018 | .612  |
|      | 2 | 3 | -.002  | .390 | .996 | -.787  | .783  |
|      |   | 1 | -.201  | .337 | .554 | -.881  | .478  |
|      | 3 | 2 | .002   | .390 | .996 | -.783  | .787  |
| MCSF | 1 | 2 | -.253  | .391 | .520 | -1.040 | .534  |
|      |   | 3 | .181   | .326 | .581 | -.475  | .837  |
|      |   | 1 | .253   | .391 | .520 | -.534  | 1.040 |
|      | 2 | 3 | .434   | .376 | .255 | -.323  | 1.191 |
|      |   | 1 | -.181  | .326 | .581 | -.837  | .475  |
|      | 3 | 2 | -.434  | .376 | .255 | -1.191 | .323  |
| NT   | 1 | 2 | -.138  | .370 | .710 | -.883  | .607  |
|      |   | 3 | -.927* | .308 | .004 | -1.548 | -.306 |
|      | 2 | 1 | .138   | .370 | .710 | -.607  | .883  |

|           |   |   |         |      |       |        |       |
|-----------|---|---|---------|------|-------|--------|-------|
|           | 3 | 3 | -.789*  | .356 | .032  | -1.506 | -.071 |
|           |   | 1 | .927*   | .308 | .004  | .306   | 1.548 |
|           |   | 2 | .789*   | .356 | .032  | .071   | 1.506 |
| NGF/NT    | 1 | 2 | .598    | .331 | .078  | -.069  | 1.265 |
|           |   | 3 | 1.369*  | .276 | <.001 | .813   | 1.925 |
|           | 2 | 1 | -.598   | .331 | .078  | -1.265 | .069  |
|           |   | 3 | .771*   | .319 | .020  | .129   | 1.413 |
|           | 3 | 1 | -1.369* | .276 | <.001 | -1.925 | -.813 |
|           |   | 2 | -.771*  | .319 | .020  | -1.413 | -.129 |
| GF        | 1 | 2 | -.413   | .370 | .271  | -1.158 | .333  |
|           |   | 3 | -1.012* | .309 | .002  | -1.634 | -.391 |
|           | 2 | 1 | .413    | .370 | .271  | -.333  | 1.158 |
|           |   | 3 | -.599   | .356 | .100  | -1.317 | .118  |
|           | 3 | 1 | 1.012*  | .309 | .002  | .391   | 1.634 |
|           |   | 2 | .599    | .356 | .100  | -.118  | 1.317 |
| NGF/GF    | 1 | 2 | .708*   | .339 | .042  | .026   | 1.390 |
|           |   | 3 | 1.274*  | .282 | <.001 | .706   | 1.842 |
|           | 2 | 1 | -.708*  | .339 | .042  | -1.390 | -.026 |
|           |   | 3 | .566    | .326 | .089  | -.091  | 1.222 |
|           | 3 | 1 | -1.274* | .282 | <.001 | -1.842 | -.706 |
|           |   | 2 | -.566   | .326 | .089  | -1.222 | .091  |
| NGF/NT+GF | 1 | 2 | .664    | .332 | .052  | -.005  | 1.333 |
|           |   | 3 | 1.350*  | .277 | <.001 | .793   | 1.908 |
|           | 2 | 1 | -.664   | .332 | .052  | -1.333 | .005  |
|           |   | 3 | .686*   | .320 | .037  | .043   | 1.330 |
|           | 3 | 1 | -1.350* | .277 | <.001 | -1.908 | -.793 |

|   |        |      |      |        |       |
|---|--------|------|------|--------|-------|
| 2 | -.686* | .320 | .037 | -1.330 | -.043 |
|---|--------|------|------|--------|-------|

Based on estimated marginal means

\*. The mean difference is significant at the .05 level.

NGF: nerve growth factor; SCF: stem cell factor; SCGF: stem cell growth factor; HGF: hepatocyte growth factor; M-CSF: macrophage colony stimulating factor.

GF: composite built using platelet-derived growth factor, vascular endothelial growth factor, and fibroblast growth factor; neurotoxicity; see ESF Table S2 for computation.
